# Supplementary material for: The Molecular Characterization of Nosocomial Carbapenem-Resistant Klebsiella pneumoniae Co-Harboring blaNDM and blaOXA-48 in Jeddah
Source: MDPI journal article supplement (doi:10.3390/microbiolres13040054), 2022-10-06
Supplement: s1 [file s1]

Supplementary file

**Table S1. Oligonucleotide sequences of primers used in the study.**

| Gene                        | Primer   | Oligonucleotide sequences (5-3)     | size  |
|-----------------------------|----------|-------------------------------------|-------|
| <i>bla<sub>IMP</sub></i>    | IMP_F    | 5'-GGA ATA GAG TGG CTT AAY TCT C-3' | 188bp |
|                             | IMP_R    | 5'-CCA AAC YAC TAS GTT ATC T-3'     |       |
| <i>bla<sub>OXA-48</sub></i> | OXA-48_F | 5'-TGT TTT TGG TGG CAT CGA T-3'     | 300bp |
|                             | OXA-48_R | 5'-GAT CGC GAT TCC AAG TGG-3'       |       |
| <i>bla<sub>VIM</sub></i>    | VIM_F    | 5'-CAT GGT GTT TGG TCG CAT A-3'     | 390bp |
|                             | VIM_R    | 5'-CGA ATG CGC AGC ACC AG-3'        |       |
| <i>bla<sub>NDM</sub></i>    | NDM_F    | 5'-GGG CAG TCG CTT CCA ACG GT-3'    | 475bp |
|                             | NDM_R    | 5'-GTA GTG CTC AGT GTC GGC-3'       |       |
| <i>bla<sub>KPC</sub></i>    | KPC_F    | 5'-CGT CTA GTT CTG CTG TCT TG-3'    | 798bp |
|                             | KPC_R    | 5'-CTT GTC ATC CTT GTT AGG CG-3'    |       |

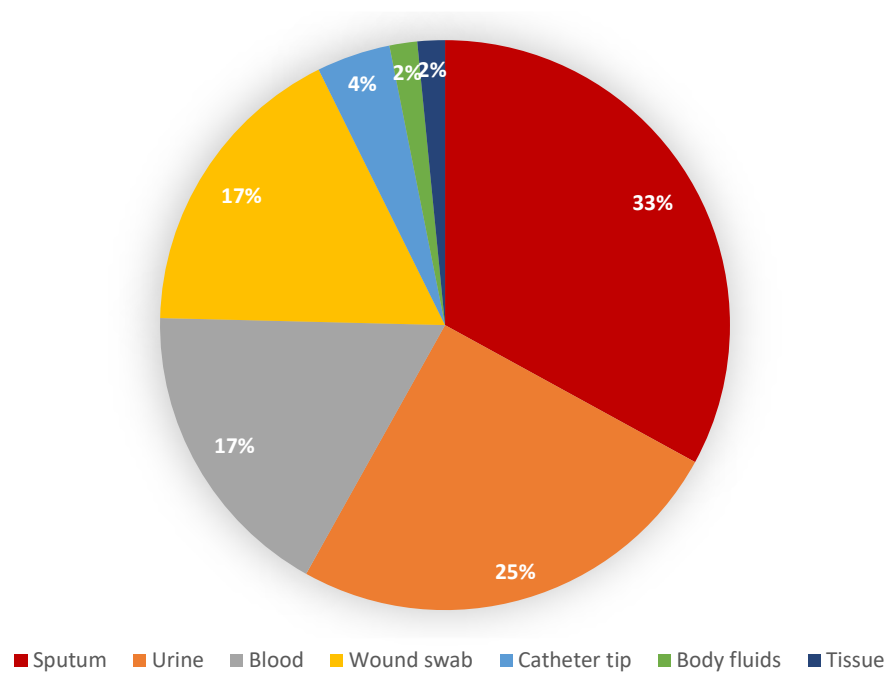

**Figure S1. Distribution of various specimen types collected.**

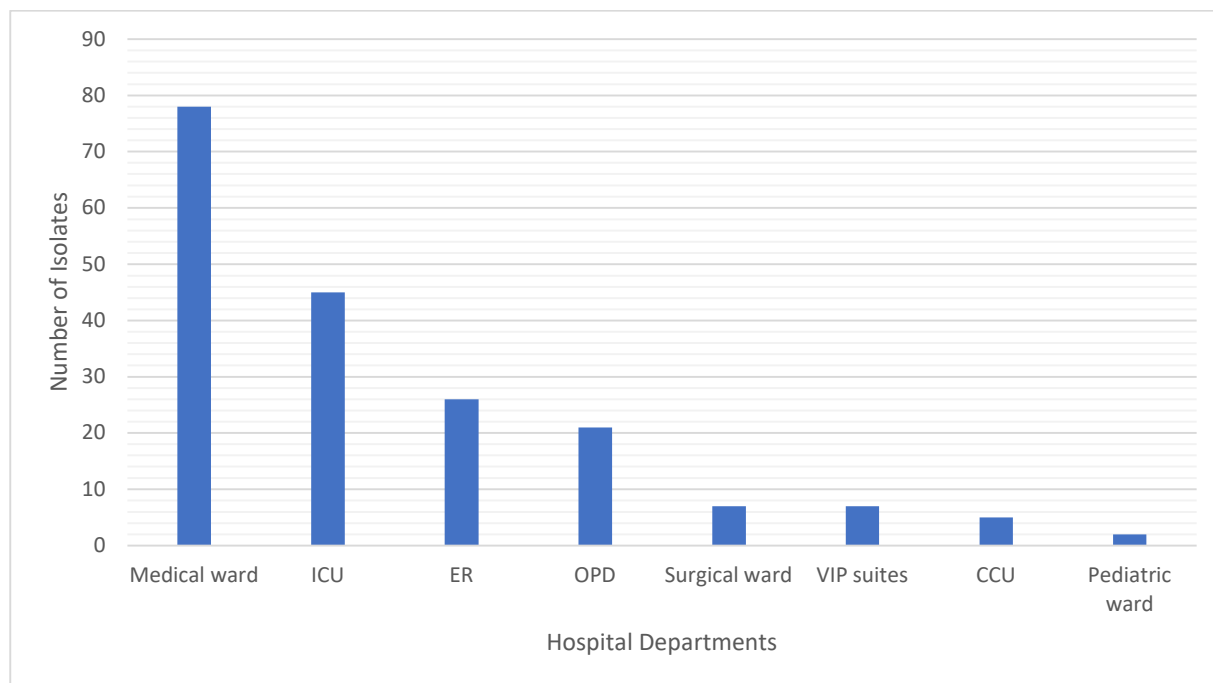

**Figure S2. Distribution of hospital departments from which the samples were collected.**

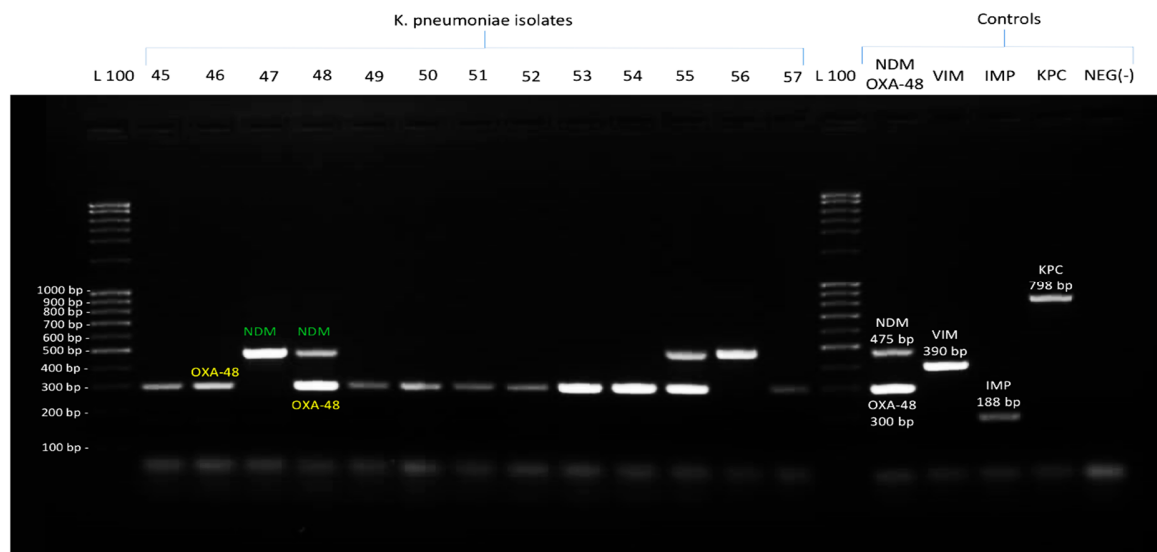

**Figure S3.** Representation of the multiplex-PCR patterns of various carbapenemase genes of *K. pneumoniae* isolates shown on gel electrophoresis.
